# Supplementary material for: Interleukin-35 expression is associated with colon cancer progression
Source: PubMed Central journal article supplement (PMC5641072; doi:10.18632/oncotarget.17751), 2017-05-10
Supplement: oncotarget-08-71563-s001.pdf [file oncotarget-08-71563-s001.pdf]

# Interleukin-35 expression is associated with colon cancer progression

## Supplementary Materials

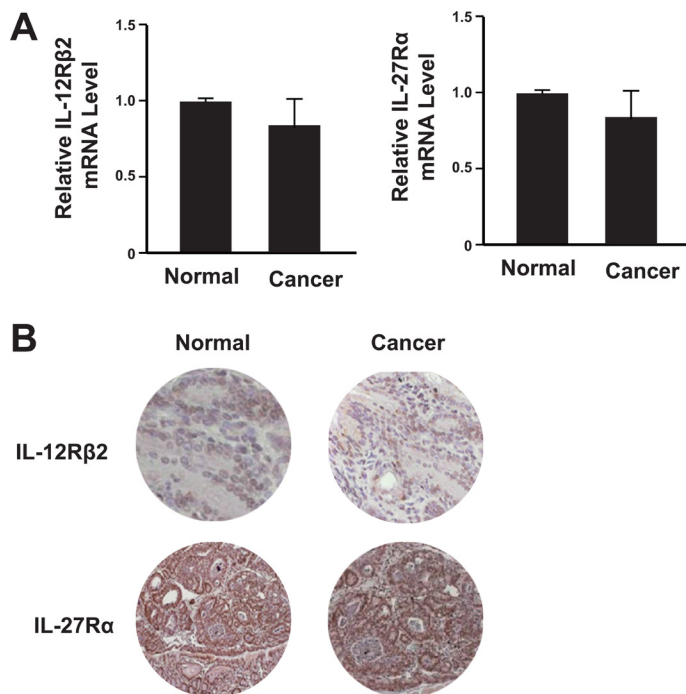

**Supplementary Figure 1: IL-35 receptor expression in human colon cancer biopsies and paired normal tissues.** (A) mRNA level of IL-35 receptor subunits ( $n = 186$ ). (B) Representative color photomicrographs of IL-35 receptor subunits expression.

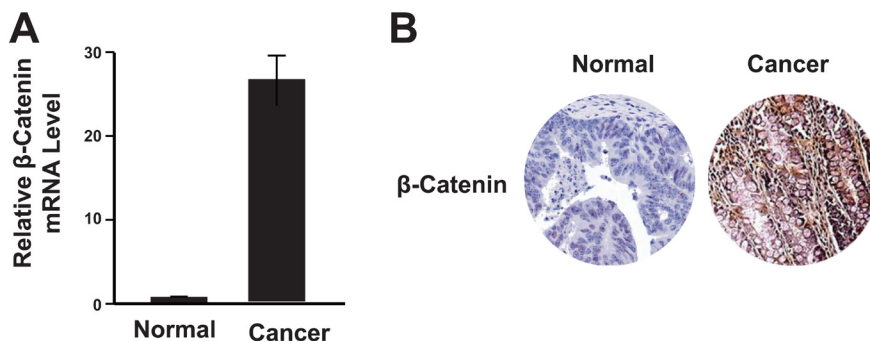

**Supplementary Figure 2: The expression level of β-catenin in human colon cancer biopsies and paired normal tissues.** (A) mRNA level of β-catenin ( $n = 186$ ). (B) Representative color photomicrographs of β-catenin expression.

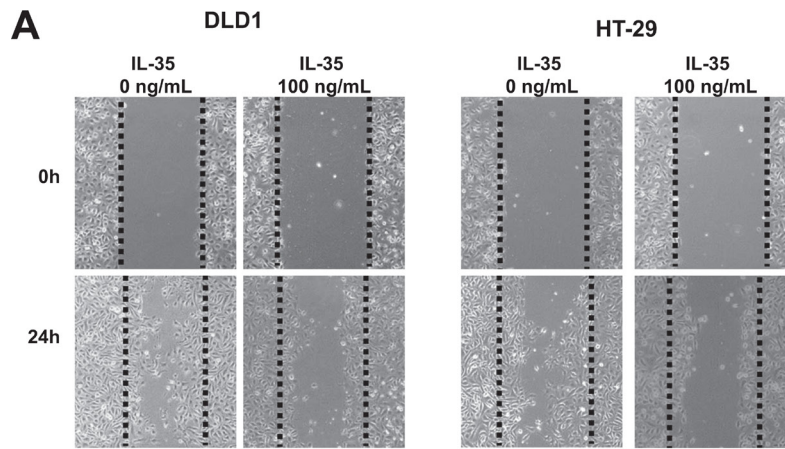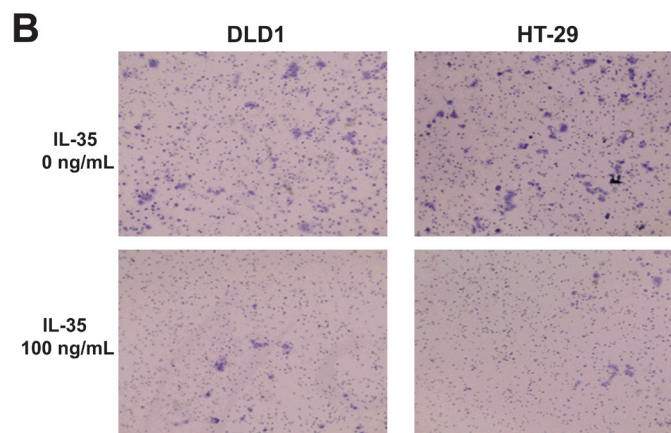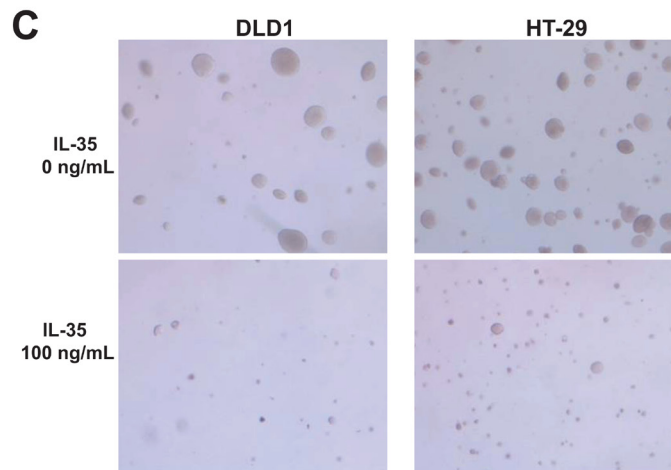

**Supplementary Figure 3:** The cell migration (A), invasion (B) and clonogenic formation (C) of DLD1 and HT-29 cells with or without IL-35 treatment.

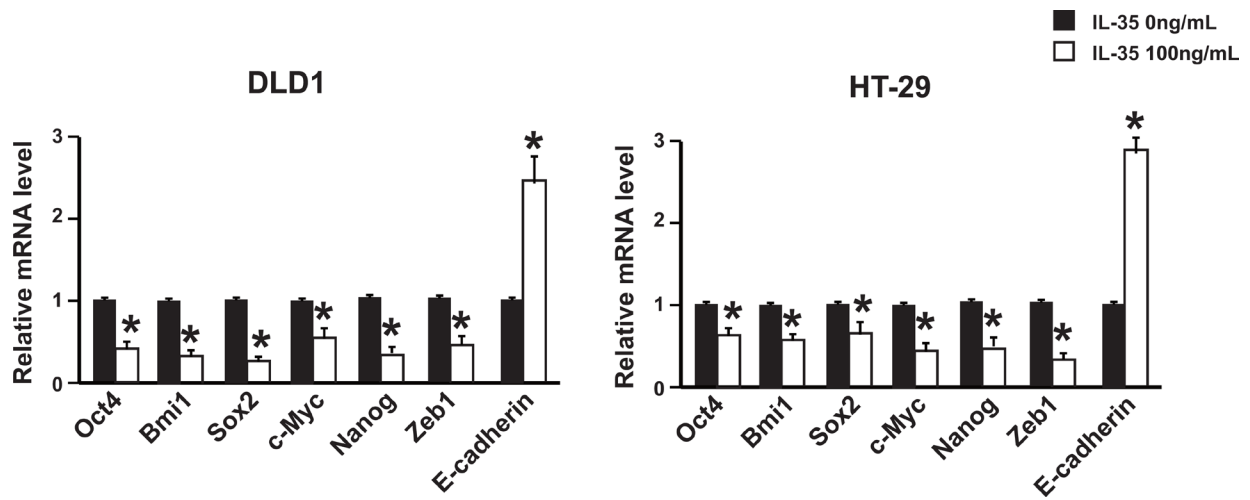

Supplementary Figure 4: The mRNA level of stemness factors in DLD1 and HT-29 cells with or without IL-35 treatment were analyzed by qPCR ( $n = 3$ ).

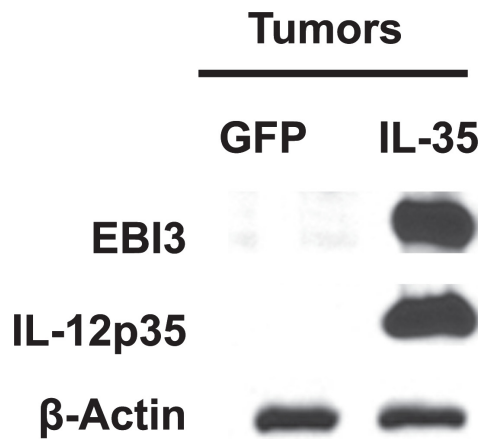

Supplementary Figure 5: Western blot analysis of IL-35 overexpression in mice colon tumors.

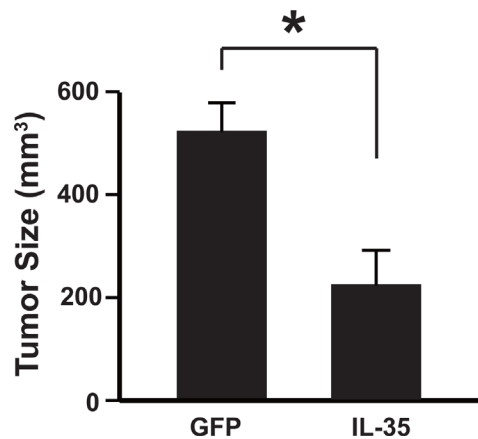

Supplementary Figure 6: Tumor size analysis of the mice transplanted with HT-29 cells overexpressing GFP or IL-35.
